# Supplementary material
Source: Springer Nature journal article supplement (https://www.springermedizin.de/resource/supplementary/12958_2010_811_MOESM1_ESM.pdf/9568904)

*BMP15*

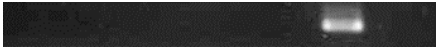

*GDF9*

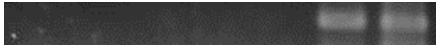

*GAPDH*

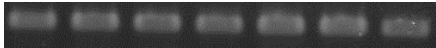

Li Kid He Sp Lu Ova Pit

Supplement: MOESM1 [file 9568904]
